# Supplementary material
Source: PubMed Central journal article supplement (PMC517876)

**Supplemental Figure 1 Domain mapping of Sgt1p sequences required for Skp1p and Ctf13p interaction.**

(A) Fragments of Sgt1p translated in reticulocyte lysates were incubated with GST-Skp1p, GST-Ctf13p or GST coupled to glutathione beads. Bound <sup>35</sup>S-Sgt1p fragments were resolved on SDS-PAGE and detected using a Storm Phosphorimager<sup>TM</sup>. (B) SGT1 alleles encoding the indicated point mutations were translated and analyzed as in (A). (C) Yeast extracts from *SGT1*, *sgt1-3*, *sgt1(L31P)*, *sgt1-5* and *sgt1(E364K)* cells grown at 25°C or 37°C in YPD medium for 3 hours were resolved by SDS-PAGE and immunoblotted with antibodies against Sgt1p.

**Supplemental Figure 2 Domain mapping of Sgt1p sequences required for Hsp82p interaction.**

Fragments of Sgt1p translated in reticulocyte lysates were incubated with MBP-Hsp82p or MBP coupled to amylose resin. Bound <sup>35</sup>S-Sgt1p fragments were resolved in SDS-PAGE and detected using a Storm Phosphorimager<sup>TM</sup>. The levels of Sgt1p specifically bound to MBP-Hsp82p are expressed as a percentage of the input and coded as in Figure 1B.

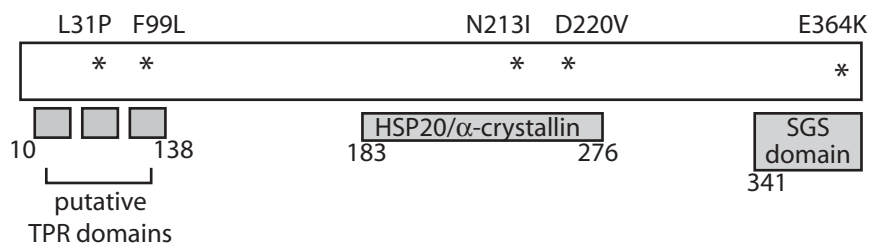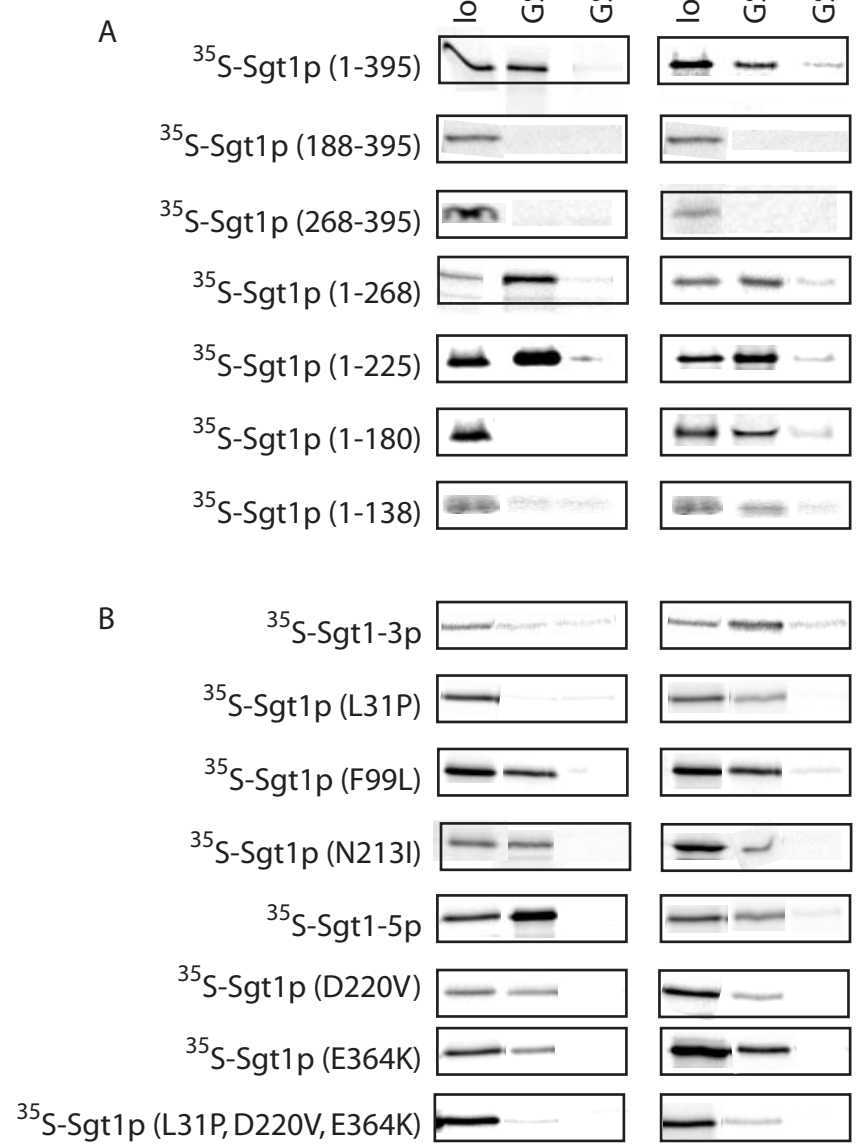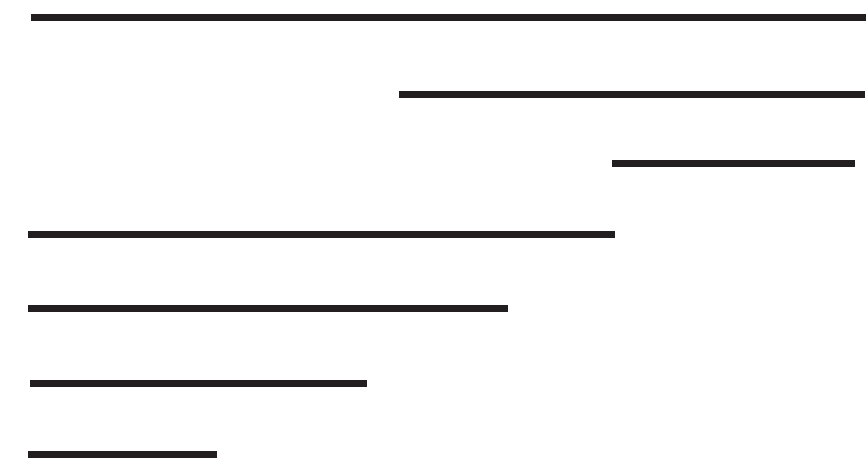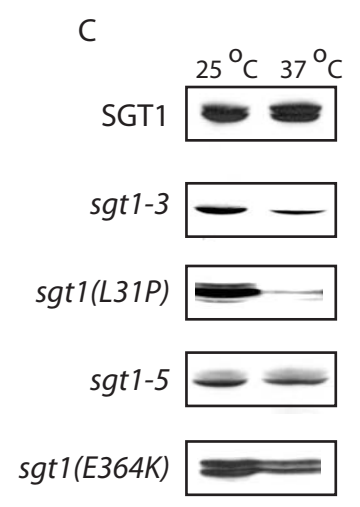

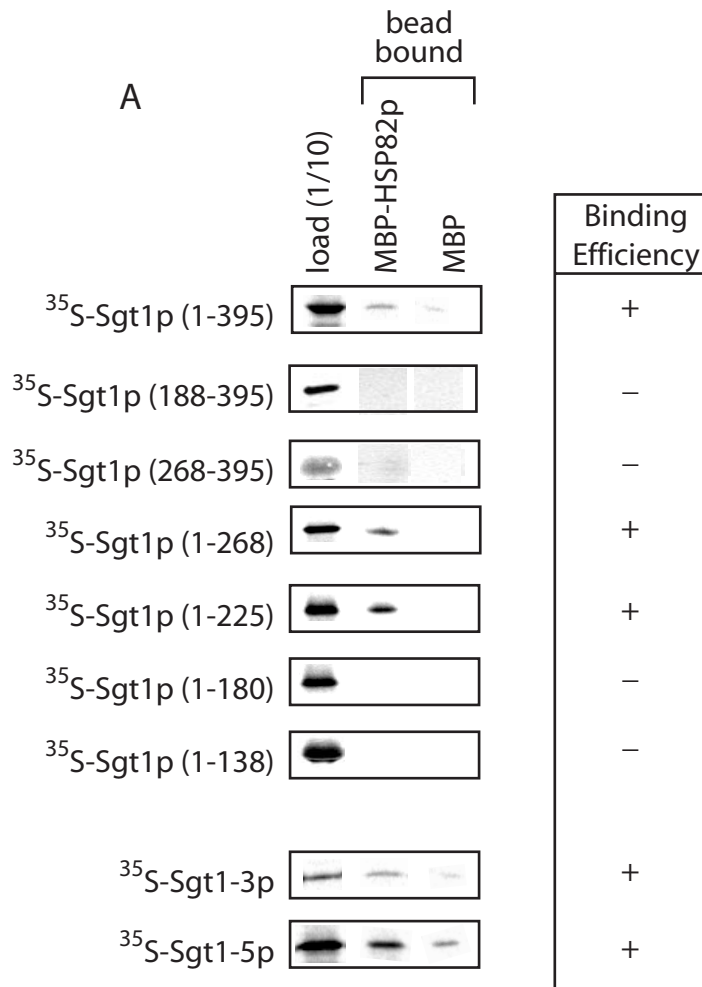

Supplement: molcellb_24_20_8938__1.pdf [file molcellb_24_20_8938__1.pdf]
